# Supplementary material for: UC.183, UC.110, and UC.84 Ultra-Conserved RNAs Are Mutually Exclusive with miR-221 and Are Engaged in the Cell Cycle Circuitry in Breast Cancer Cell Lines
Source: MDPI journal article supplement (doi:10.3390/genes12121978), 2021-12-13
Supplement: s1 [file s1]

**Table S3. NcRNAs expression in synchronized cells.** The ncRNA levels were indicated as fold changes (FC) determined by qPCRs ( $2^{-\Delta\Delta C_q}$ ) in synchronized cells with double thymidine block or serum starvation compared to no synchronized negative control. Data represent the fold change values T0 (at the end of the block, cells arrested in G0/G1 phase) and T8 (8 h from release).

| MCF-7       |                        |            |            |               | MDA-MB-231  |                        |            |            |               |
|-------------|------------------------|------------|------------|---------------|-------------|------------------------|------------|------------|---------------|
|             | Condition              | T0<br>(FC) | T8<br>(FC) | T8/T0<br>(FC) |             | Condition              | T0<br>(FC) | T8<br>(FC) | T8/T0<br>(FC) |
| pre-mir-221 | Double thymidine block | 0.36       | 2.56       | 7.09          | pre-mir-221 | Double thymidine block | 0.52       | 2.21       | 4.21          |
|             | Serum starvation       | 24.01      | 12.25      | 0.51          |             | Serum starvation       | 0.05       | 0.31       | 6.36          |
| mir-221     | Double thymidine block | 0.31       | 4.56       | 14.66         | mir-221     | Double thymidine block | 0.29       | 0.00       | 0.01          |
|             | Serum starvation       | 2.02       | 5.65       | 2.81          |             | Serum starvation       | 9.98       | 0.01       | 0.00          |
| uc.183      | Double thymidine block | 1.26       | 0.08       | 0.07          | uc.183      | Double thymidine block | 12.27      | 0.14       | 0.01          |
|             | Serum starvation       | 3.71       | 0.01       | <0.00         |             | Serum starvation       | 6.86       | 0.15       | 0.02          |
| uc.110      | Double thymidine block | 0.80       | 0.47       | 0.49          | uc.110      | Double thymidine block | 4.75       | 0.05       | 0.01          |
|             | Serum starvation       | 0.15       | 0.15       | 1.00          |             | Serum starvation       | 2.16       | 2.16       | 1.00          |
| uc.96       | Double thymidine block | 3.82       | 0.67       | 0.18          | uc.96       | Double thymidine block | 1.77       | 1.30       | 0.73          |
|             | Serum starvation       | 11.91      | 0.11       | 0.01          |             | Serum starvation       | 17.43      | 0.82       | 0.05          |
| uc.84       | Double thymidine block | 5.89       | 4.71       | 0.81          | uc.84       | Double thymidine block | 0.01       | 0.16       | 16.08         |
|             | Serum starvation       | 3.79       | 5.50       | 1.45          |             | Serum starvation       | 0.02       | 1.12       | 45.14         |
