# Supplementary material for: UC.183, UC.110, and UC.84 Ultra-Conserved RNAs Are Mutually Exclusive with miR-221 and Are Engaged in the Cell Cycle Circuitry in Breast Cancer Cell Lines
Source: MDPI journal article supplement (doi:10.3390/genes12121978), 2021-12-13
Supplement: s1 [file s1]

**Table S2.** Primers used in qPCRs to amplified specific targets.

| <b>Name</b> | <b>Forward primer</b>     | <b>Reverse primer</b>      |
|-------------|---------------------------|----------------------------|
| uc.84       | CTGCTTGATGTAACTTGATTAGCTC | AAATCTACATCTATCATTTTGCCAAT |
| uc.96       | ACCCATCATGCATGTAAACG      | AATGGAGTTTGCCGTGAGTT       |
| uc.110      | CCGTCCTCCCTGCACTAA        | CAGCCAAAGGGGAAGTGTAT       |
| uc.183      | CTGCCCTATCAACTTTCGATGGTAG | CCGTTTCTCAGGCTCCCTCTC      |
| pre-miR-221 | GAGAACATGTTTCCAGGTAG      | CAGGTCTGGGGCATGAAC         |
| CCNB1       | AGGCGAAGATCAACATGGCA      | GGGCTTGGAGAGGCAGTATC       |
| E2F1        | CTTGGAGGGACCAGGGTTTC      | GTTACCTTCATTCCCCGGT        |
| TP53        | TCACTTCCTTTTTCCGCAGT      | TTCTGGCACTTCATCACAGC       |
| CDKN1A      | GCTTCATGCCAGCTACTTCC      | CTGTGCTCACTTCAGGGTCA       |
| CDKN1B      | GTGCGAGTGTCTAACGGGAG      | AGCCGGAGCCCCAATTAAAG       |
| FBXW11      | CAGCTAGAGTGGGTGCGAT       | GGCCTCTTCTGGAGACGAT        |
| B-Act       | CATTGCCGACAGGATGCA        | GCTGATCCACATCTGCTGGA       |
