# Supplementary material for: UC.183, UC.110, and UC.84 Ultra-Conserved RNAs Are Mutually Exclusive with miR-221 and Are Engaged in the Cell Cycle Circuitry in Breast Cancer Cell Lines
Source: MDPI journal article supplement (doi:10.3390/genes12121978), 2021-12-13
Supplement: s1 [file s1]

|        |                              |
|--------|------------------------------|
| Pool 1 | uc.96, uc.48, uc.31          |
| Pool 2 | uc.84, uc.177, uc.167, uc.78 |
| Pool 3 | uc.340, uc.10, uc.110        |
| Pool 4 | uc.183, uc.31, uc.309        |

**Figure S1. The uc. siRNA pool composition.** siRNA from table 2 grouped in pool as described.
