# Supplementary material for: UC.183, UC.110, and UC.84 Ultra-Conserved RNAs Are Mutually Exclusive with miR-221 and Are Engaged in the Cell Cycle Circuitry in Breast Cancer Cell Lines
Source: MDPI journal article supplement (doi:10.3390/genes12121978), 2021-12-13
Supplement: s1 [file s1]

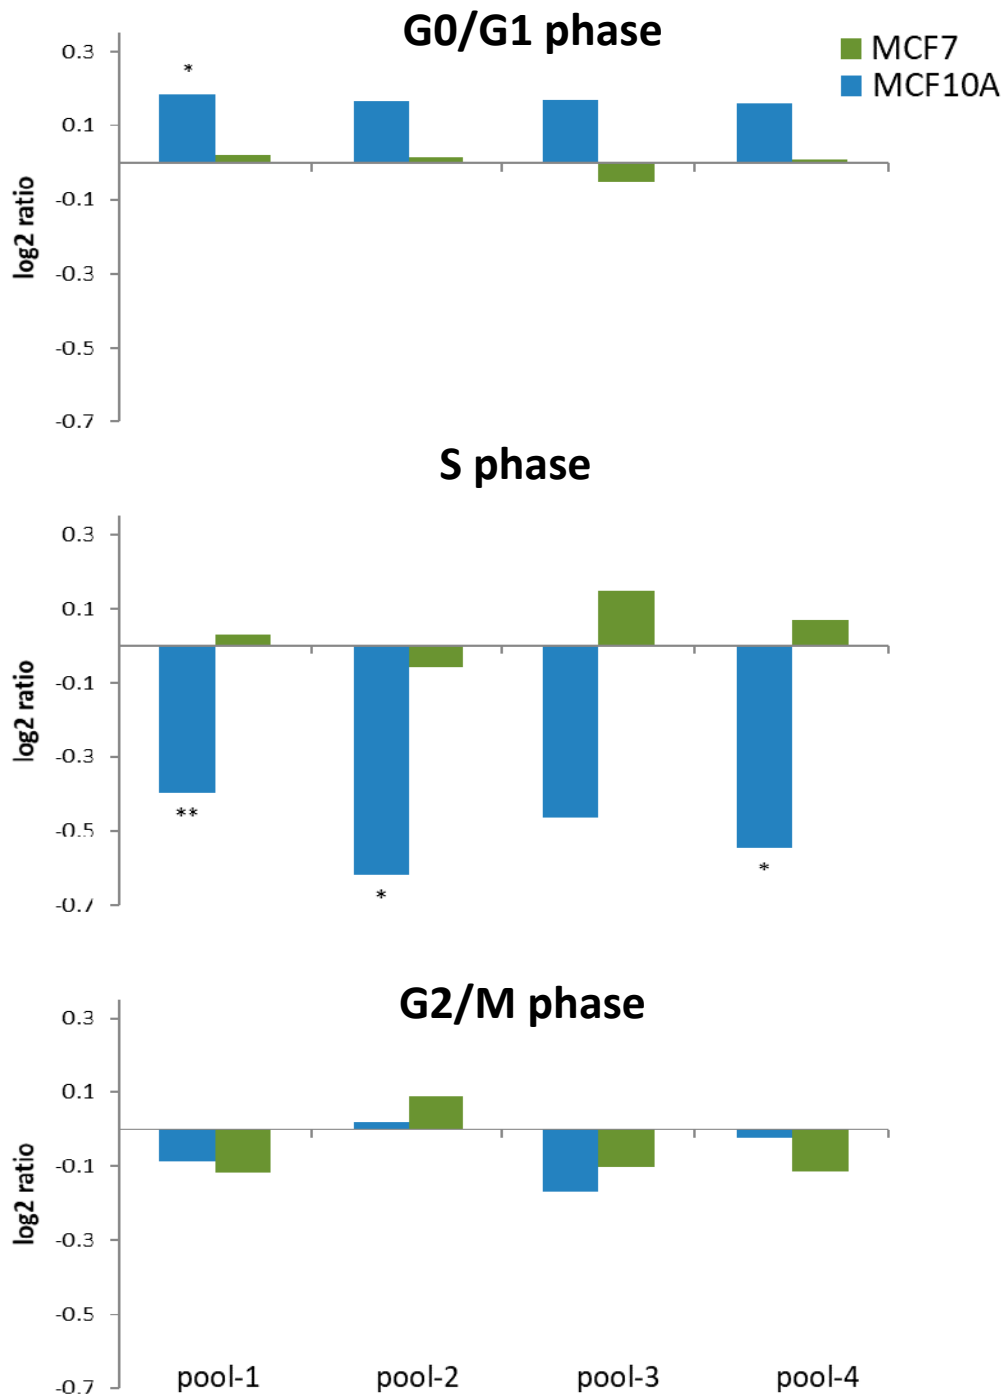

**Figure S2. siRNA pool transfection effect in cell cycle.** Flow cytometer analysis after pools transfection in MCF10A and MCF7 cell lines shows a significant cell cycle modification calculated by Student T-test. (\*) p-value<0.05, (\*\*) p-value <0.01.
