# Supplementary material for: UC.183, UC.110, and UC.84 Ultra-Conserved RNAs Are Mutually Exclusive with miR-221 and Are Engaged in the Cell Cycle Circuitry in Breast Cancer Cell Lines
Source: MDPI journal article supplement (doi:10.3390/genes12121978), 2021-12-13
Supplement: s1 [file s1]

**Table S1.** T-UCR siRNAs oligonucleotide sequences.

| siRNA name | Sequence (5'→3')            | Genomic siRNA strand | Genomic strand T-UCR |
|------------|-----------------------------|----------------------|----------------------|
| uc.84      | GGGAGGGAGCUAAUCAAGUUACAUCAA | +                    | -                    |
| uc.84      | GAUGUAACUUGAUUAGCUCCCUC     | -                    | -                    |
| uc.110     | AUCAUUGGGAGUAAUUUGAAGCUCAG  | +                    | -                    |
| uc.110     | GAGCUUCAAUUAAACUCCCAAUGAU   | -                    | -                    |
| uc.183     | GUGUUCUGUGCCAAGGUCUUUGUGGCU | -                    | +                    |
| uc.183     | CCACAAAGACCUUGGCACAGAACAC   | +                    | +                    |
| uc.96      | AAGGACUGACACAAGAACACUUUGUGU | -                    | +                    |
| uc.96      | ACAAAGUGUUCUUGUGUCAGUCCTT   | +                    | +                    |
