# Supplementary material for: UC.183, UC.110, and UC.84 Ultra-Conserved RNAs Are Mutually Exclusive with miR-221 and Are Engaged in the Cell Cycle Circuitry in Breast Cancer Cell Lines
Source: MDPI journal article supplement (doi:10.3390/genes12121978), 2021-12-13
Supplement: s1 [file s1]

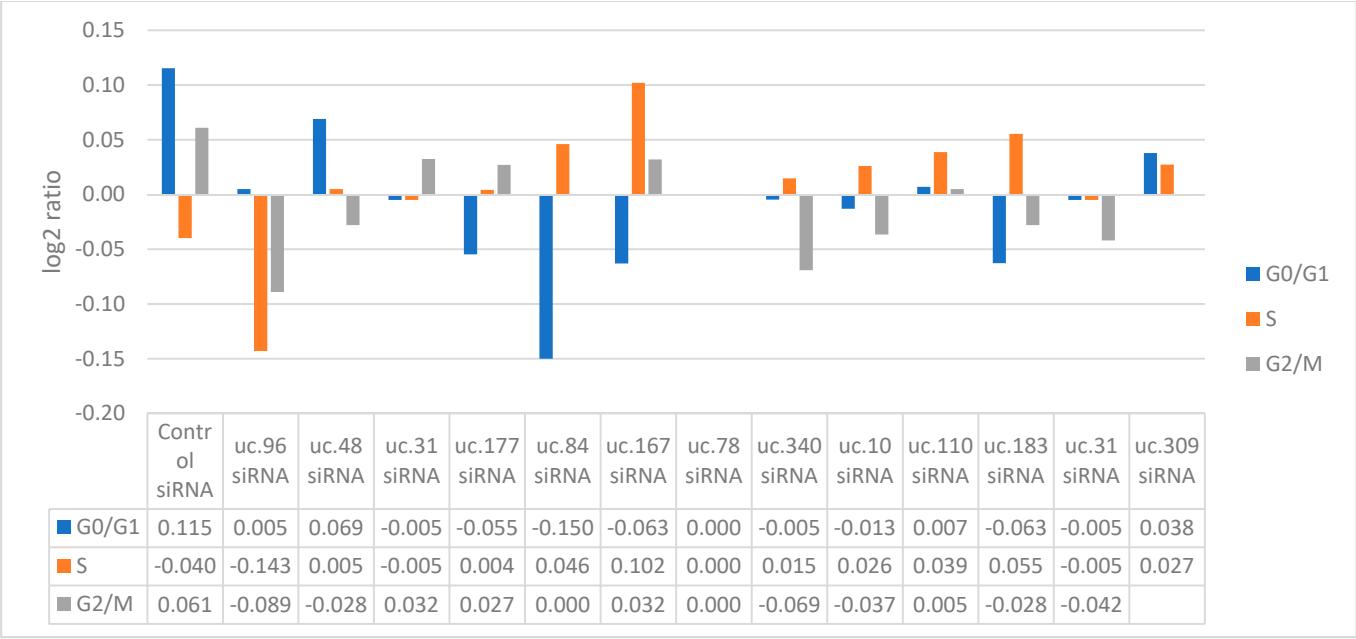

**Figure S3. RNA interference of T-UCR from Table 2 on cell cycle in MCF7.** Cell cycle was analyzed after transfections with siRNAs against T-UCR reported in Table2. Quantification was plotted as log2 ratio (median).
