# Supplementary material for: UC.183, UC.110, and UC.84 Ultra-Conserved RNAs Are Mutually Exclusive with miR-221 and Are Engaged in the Cell Cycle Circuitry in Breast Cancer Cell Lines
Source: MDPI journal article supplement (doi:10.3390/genes12121978), 2021-12-13
Supplement: s1 [file s1]

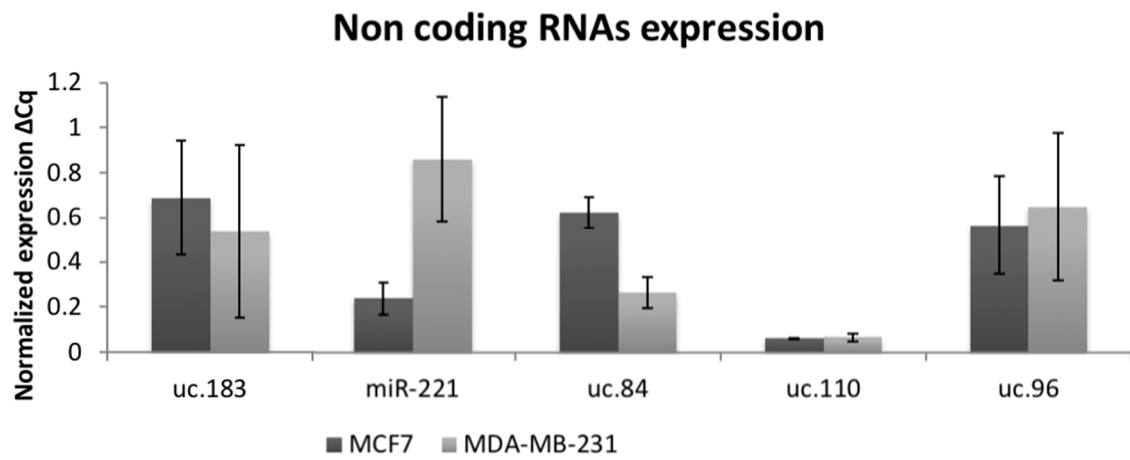

**Figure S8. Real time analysis of T-UCR expression in BC cell lines.** Basal T-UCR expression levels normalized to  $\beta$ -Actin housekeeping gene. Values are median  $\pm$  SEM of triplicate experiments.
