# Supplementary material for: UC.183, UC.110, and UC.84 Ultra-Conserved RNAs Are Mutually Exclusive with miR-221 and Are Engaged in the Cell Cycle Circuitry in Breast Cancer Cell Lines
Source: Genes (Basel). 2021 Dec 13;12(12):1978. doi: 10.3390/genes12121978 (PMC8701292; doi:10.3390/genes12121978)
Supplement: Supplementary file 1 [file genes-12-01978-s001.zip]

Archive with 10 entries (10 files):
- Figure S1.pdf
- Figure S2.pdf
- Figure S3.pdf
- Figure S8.pdf
- Figure S9.png
- Figures S4-S7.pdf
- Table S1.pdf
- Table S2.pdf
- Table S3.pdf
- TableS4.xlsx
