# Supplementary material for: UC.183, UC.110, and UC.84 Ultra-Conserved RNAs Are Mutually Exclusive with miR-221 and Are Engaged in the Cell Cycle Circuitry in Breast Cancer Cell Lines
Source: Genes (Basel). 2021 Dec 13;12(12):1978. doi: 10.3390/genes12121978 (PMC8701292; doi:10.3390/genes12121978)
Supplement: Supplementary file 1 [file genes-12-01978-s001.zip › TableS4.xlsx]

## Sheet: Table S4 
ncRNA	Cell lines	drugs	P-values	Benj-Hoch significance	Benj-Hoch P-value
uc.110	MCF7	BYL719	0,009395	significant	0,046662
uc.110	MCF7	AZD5363	0,010968	significant	0,046662
uc.110	MCF7	AZD7762	0,012912	significant	0,046662
uc.110	MCF7	ERLOTINIB	0,013332	significant	0,046662
uc.110	MCF7	AZD8055	0,019956	not significant	0,0558768
uc.110	MCF7	XL765	0,032318	not significant	0,07540866667
uc.110	MCF7	GSK1070916	0,073165	not significant	0,1443648889
uc.110	MCF7	SCH772984	0,085024	not significant	0,1443648889
uc.110	MCF7	GEFITINIB	0,092806	not significant	0,1443648889
uc.110	MCF7	AMG511	0,116856	not significant	0,1635984
uc.110	MCF7	LEE011	0,199986	not significant	0,2545276364
uc.110	MCF7	DOXORUBICIN	0,221582	not significant	0,2585123333
uc.110	MCF7	DOCETAXEL	0,689909	not significant	0,716296
uc.110	MCF7	TRAMETINIB	0,716296	not significant	0,716296
uc.110	MDA-231	DOCETAXEL	0,000018	significant	0,000252
uc.110	MDA-231	XL765	0,000772	significant	0,005404
uc.110	MDA-231	AZD5363	0,003862	significant	0,01802266667
uc.110	MDA-231	AZD7762	0,030736	not significant	0,107576
uc.110	MDA-231	AMG511	0,055456	not significant	0,147693
uc.110	MDA-231	SCH772984	0,063297	not significant	0,147693
uc.110	MDA-231	GEFITINIB	0,11208	not significant	0,22416
uc.110	MDA-231	BYL719	0,137645	not significant	0,24087875
uc.110	MDA-231	TRAMETINIB	0,258412	not significant	0,3877113333
uc.110	MDA-231	AZD8055	0,289459	not significant	0,3877113333
uc.110	MDA-231	DOXORUBICIN	0,331249	not significant	0,3877113333
uc.110	MDA-231	ERLOTINIB	0,332324	not significant	0,3877113333
uc.110	MDA-231	GSK1070916	0,651103	not significant	0,7011878462
uc.110	MDA-231	LEE011	0,808632	not significant	0,808632
uc.84	MCF7	BYL719	0,004367	significant	0,029806
uc.84	MCF7	AZD5363	0,005921	significant	0,029806
uc.84	MCF7	SCH772984	0,006387	significant	0,029806
uc.84	MCF7	XL765	0,028667	not significant	0,1003345
uc.84	MCF7	AZD7762	0,042466	not significant	0,1075946667
uc.84	MCF7	AZD8055	0,046112	not significant	0,1075946667
uc.84	MCF7	LEE011	0,11886	not significant	0,23772
uc.84	MCF7	TRAMETINIB	0,165724	not significant	0,290017
uc.84	MCF7	AMG511	0,196689	not significant	0,3059606667
uc.84	MCF7	ERLOTINIB	0,291084	not significant	0,4075176
uc.84	MCF7	GEFITINIB	0,335586	not significant	0,4271094545
uc.84	MCF7	GSK1070916	0,539834	not significant	0,6298063333
uc.84	MCF7	DOCETAXEL	0,664377	not significant	0,7154829231
uc.84	MCF7	DOXORUBICIN	0,846104	not significant	0,846104
uc.84	MDA-231	AZD5363	0,000012	significant	0,000168
uc.84	MDA-231	AMG511	0,012128	not significant	0,084896
uc.84	MDA-231	AZD7762	0,026803	not significant	0,1250806667
uc.84	MDA-231	GSK1070916	0,040665	not significant	0,1423275
uc.84	MDA-231	XL765	0,052515	not significant	0,147042
uc.84	MDA-231	DOXORUBICIN	0,089685	not significant	0,209265
uc.84	MDA-231	SCH772984	0,147883	not significant	0,295766
uc.84	MDA-231	AZD8055	0,171924	not significant	0,300867
uc.84	MDA-231	LEE011	0,262936	not significant	0,3803618
uc.84	MDA-231	DOCETAXEL	0,271687	not significant	0,3803618
uc.84	MDA-231	BYL719	0,337522	not significant	0,4295734545
uc.84	MDA-231	GEFITINIB	0,388496	not significant	0,4532453333
uc.84	MDA-231	TRAMETINIB	0,95838	not significant	0,991899
uc.84	MDA-231	ERLOTINIB	0,991899	not significant	0,991899
uc.183	MCF7	BYL719	0,001396	significant	0,019544
uc.183	MCF7	XL765	0,025751	not significant	0,180257
uc.183	MCF7	SCH772984	0,050758	not significant	0,2019724
uc.183	MCF7	AZD5363	0,061795	not significant	0,2019724
uc.183	MCF7	LEE011	0,072133	not significant	0,2019724
uc.183	MCF7	ERLOTINIB	0,0978	not significant	0,2282
uc.183	MCF7	AZD8055	0,130216	not significant	0,260432
uc.183	MCF7	AMG511	0,159851	not significant	0,27973925
uc.183	MCF7	DOXORUBICIN	0,212392	not significant	0,3303875556
uc.183	MCF7	TRAMETINIB	0,246874	not significant	0,3456236
uc.183	MCF7	DOCETAXEL	0,649054	not significant	0,823816
uc.183	MCF7	AZD7762	0,706128	not significant	0,823816
uc.183	MCF7	GEFITINIB	0,867836	not significant	0,9345926154
uc.183	MCF7	GSK1070916	0,968737	not significant	0,968737
uc.183	MDA-231	AZD5363	0,000006	significant	0,000084
uc.183	MDA-231	AZD7762	0,000015	significant	0,000105
uc.183	MDA-231	DOCETAXEL	0,003731	significant	0,01741133333
uc.183	MDA-231	GSK1070916	0,045333	not significant	0,1586655
uc.183	MDA-231	GEFITINIB	0,157173	not significant	0,4390236667
uc.183	MDA-231	BYL719	0,188153	not significant	0,4390236667
uc.183	MDA-231	TRAMETINIB	0,267829	not significant	0,535658
uc.183	MDA-231	SCH772984	0,439046	not significant	0,7683305
uc.183	MDA-231	AMG511	0,581893	not significant	0,876566
uc.183	MDA-231	AZD8055	0,664058	not significant	0,876566
uc.183	MDA-231	LEE011	0,728622	not significant	0,876566
uc.183	MDA-231	ERLOTINIB	0,829205	not significant	0,876566
uc.183	MDA-231	XL765	0,839125	not significant	0,876566
uc.183	MDA-231	DOXORUBICIN	0,876566	not significant	0,876566
miR-221	MDA-MB-231	GEFITINIB	0.000535	significant	0.003745
miR-221	MDA-MB-231	DOCETAXEL	0.005815	significant	0.02326
miR-221	MDA-MB-231	ERLOTINIB	0.011573	significant	0.0360049
miR-221	MDA-MB-231	GSK1070916	0.073355	not significant	0.186722
miR-221	MDA-MB-231	DOXORUBICIN	0.172162	not significant	0.37081
miR-221	MDA-MB-231	LEE011	0.277965	not significant	0.472678
miR-221	MDA-MB-231	AZD7762	0.311521	not significant	0.472678
miR-221	MDA-MB-231	TRAMETINIB	0.320746	not significant	0.472678
miR-221	MDA-MB-231	AZD5363	0.341122	not significant	0.477571
miR-221	MDA-MB-231	SCH772984	0.358971	not significant	0.478628
miR-221	MDA-MB-231	AMG511	0.606041	not significant	0.771325
miR-221	MDA-MB-231	BYL719	0.730444	not significant	0.880024
miR-221	MDA-MB-231	AZD8055	0.754306	not significant	0.880024
miR-221	MDA-MB-231	XL765	0.892868	not significant	0.905234
miR-221	MCF7	DOXORUBICIN	6.2e-05	significant	0.001736
miR-221	MCF7	GEFITINIB	0.000184	significant	0.002576
miR-221	MCF7	ERLOTINIB	0.000511	significant	0.003745
miR-221	MCF7	GSK1070916	0.002465	significant	0.013804
miR-221	MCF7	DOCETAXEL	0.00296	significant	0.0138133
miR-221	MCF7	AZD7762	0.010156	significant	0.035546
miR-221	MCF7	AMG511	0.016218	significant	0.0454104
miR-221	MCF7	BYL719	0.144829	not significant	0.337934
miR-221	MCF7	LEE011	0.189531	not significant	0.379062
miR-221	MCF7	AZD5363	0.2093	not significant	0.390693
miR-221	MCF7	SCH772984	0.296626	not significant	0.472678
miR-221	MCF7	TRAMETINIB	0.863214	not significant	0.905234
miR-221	MCF7	AZD8055	0.901999	not significant	0.905234
miR-221	MCF7	XL765	0.905234	not significant	0.905234
